# Supplementary material for: IFN-γ-dependent NK cell activation is essential to metastasis suppression by engineered Salmonella
Source: Nat Commun. 2021 May 5;12:2537. doi: 10.1038/s41467-021-22755-3 (PMC8099885; doi:10.1038/s41467-021-22755-3)
Supplement: Supplementary file 1 — Supplementary Information [file 41467_2021_22755_MOESM1_ESM.pdf]

# IFN- $\gamma$ -dependent NK cell activation is essential to metastasis suppression by engineered *Salmonella*

## Supplementary Information

Qiubin Lin<sup>1,2,7</sup>, Li Rong<sup>1,7</sup>, Xian Jia<sup>3</sup>, Renhao Li<sup>1,4</sup>, Bin Yu<sup>1</sup>, Jingchu Hu<sup>5</sup>, Xiao Luo<sup>5</sup>, Badea SR<sup>1</sup>, Chen Xu<sup>1</sup>, Guofeng Fu<sup>3</sup>, Kejiong Lai<sup>3</sup>, Ming-chun Lee<sup>1</sup>, Baozhong Zhang<sup>5</sup>, Huarui Gong<sup>1</sup>, Nan Zhou<sup>5</sup>, Xiao Lei Chen<sup>3,6</sup>, Shu-hai Lin<sup>3,\*</sup>, Guo Fu<sup>3,6,\*</sup>, Jian-Dong Huang<sup>1,2,5,\*</sup>

<sup>1</sup>School of Biomedical Sciences, the University of Hong Kong, Pokfulam, Hong Kong SAR, China.

<sup>2</sup>HKU-Zhejiang Institute of Research and Innovation (HKU-ZIRI), Hangzhou, PR China.

<sup>3</sup>State Key Laboratory of Cellular Stress Biology, Innovation Center for Cell Signaling Network, School of Medicine, Xiamen University, Xiamen, China.

<sup>4</sup>Department of Medicine, Li Ka Shing Faculty of Medicine, The University of Hong Kong, Pokfulam, Hong Kong SAR, China.

<sup>5</sup>Institute of Synthetic Biology, Shenzhen Institutes of Advanced Technology, Chinese Academy of Sciences, Shenzhen 518055, PR China.

<sup>6</sup>Cancer Research Center of Xiamen University, Xiamen, China.

<sup>7</sup>These authors equally contribute to this study.

\*: Correspondence should be addressed to J.D.H. (E-mail: [jdhuang@hku.hk](mailto:jdhuang@hku.hk)), S.H.L. ([shuhai@xmu.edu.cn](mailto:shuhai@xmu.edu.cn)); and G.F. ([guofu@xmu.edu.cn](mailto:guofu@xmu.edu.cn))

## Supplementary figures and legends

Supplementary Fig. 1

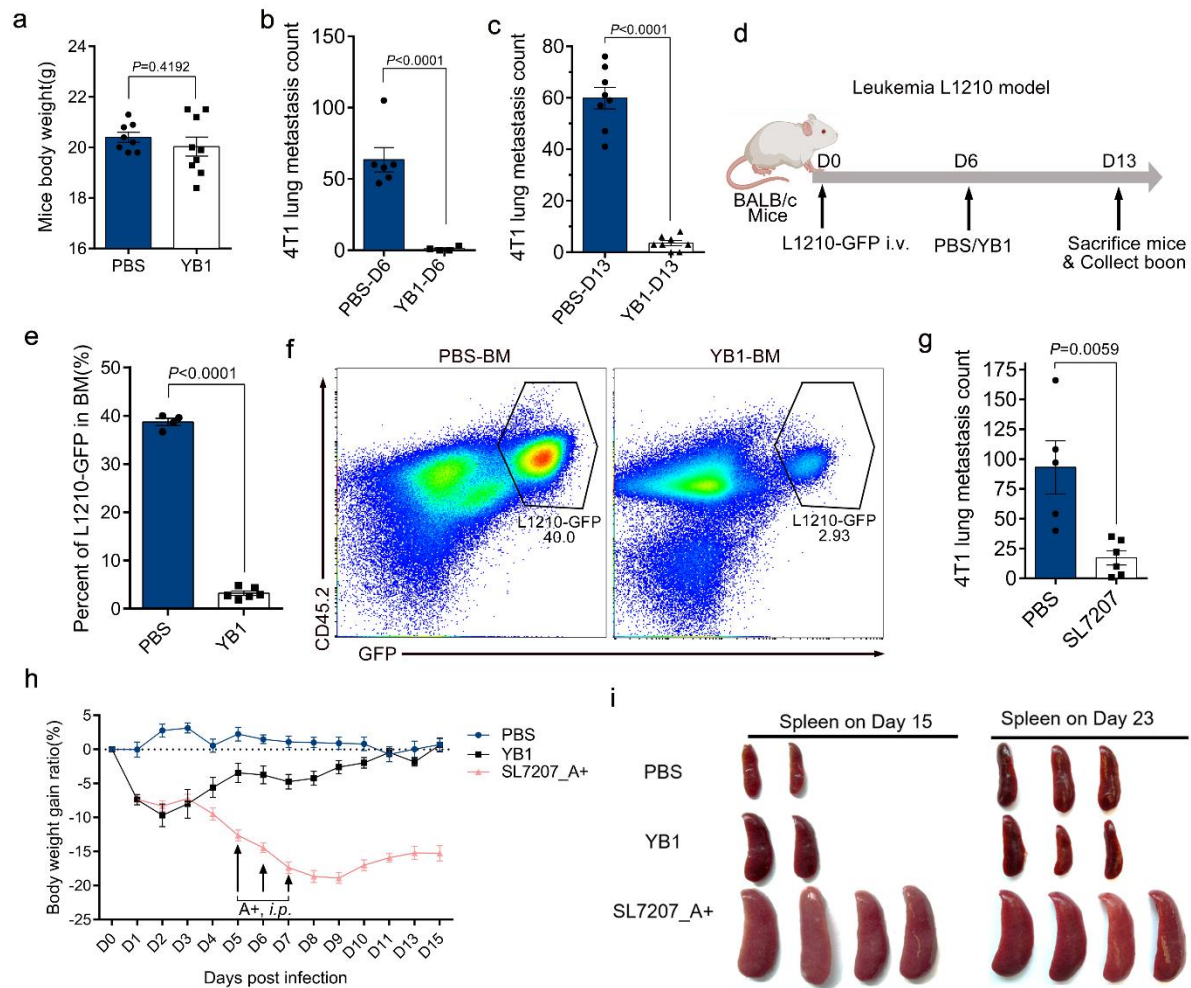

**Supplementary Fig. 1 *Salmonella* YB1 treatment inhibits cancer metastasis and prolongs the survival of mice.** **a** Mice body weight was measured before surgery to remove 4T1 primary tumors (n=8 PBS, n=9 YB1). **b** Quantification of lung metastases in the 4T1-BALB/c experimental metastasis model. 4T1 cells were i.v. injected on day 6 (n=6 mice) post *Salmonella* YB1 treatment. **c** Quantification of lung metastases in the 4T1-BALB/c experimental metastasis model. 4T1 cells were i.v. injected on day 13 (n=8 per group) post *Salmonella* YB1 treatment. **d** BALB/c mice were i.v. injected with  $5 \times 10^6$  L1210-GFP cells on day 0 and treated with either *Salmonella* or PBS on day 6. All mice were sacrificed on day 13 to quantify the L1210-GFP cells in the bone marrow. **e** Quantification of the percentage of L1210-GFP cells to total immune cells in the bone marrow (n=4 in PBS group, n=6 in YB1 group). **f** Representative flow cytometry dot plots illustrating the percentage of L1210-GFP in the bone marrow of mice treated with PBS or YB1. **g** Quantification of lung metastases in the 4T1-BALB/c experimental metastasis model post *Salmonella* SL7207 treatment. Ampicillin was given to mice from day 3 to kill *Salmonella* (n=5 in PBS group, n=6 in SL7207 group). **h-i** 18 BALB/c mice were divided into three groups

and treated with PBS (n=5),  $8 \times 10^6$  CFU of YB1 (n=5), or  $8 \times 10^6$  CFU of SL7207(n=8), respectively. 100ul 100mg/ml ampicillin was given to each SL7207 treated mouse (SL7207\_A+) on days 5, 6, and 7 by i.p. injection to control *salmonella* infection. Daily body weight changes were monitored before day 15 (**h**). Mice were killed at two timepoints to harvest spleen (**i**). *P*-values were derived using two-tailed unpaired t-tests. All data are shown as the mean values  $\pm$  s.e.m. Displayed is one representative experiment of 2 independent experiments. Source data are provided as a Source Data file.

### Supplementary Fig. 2

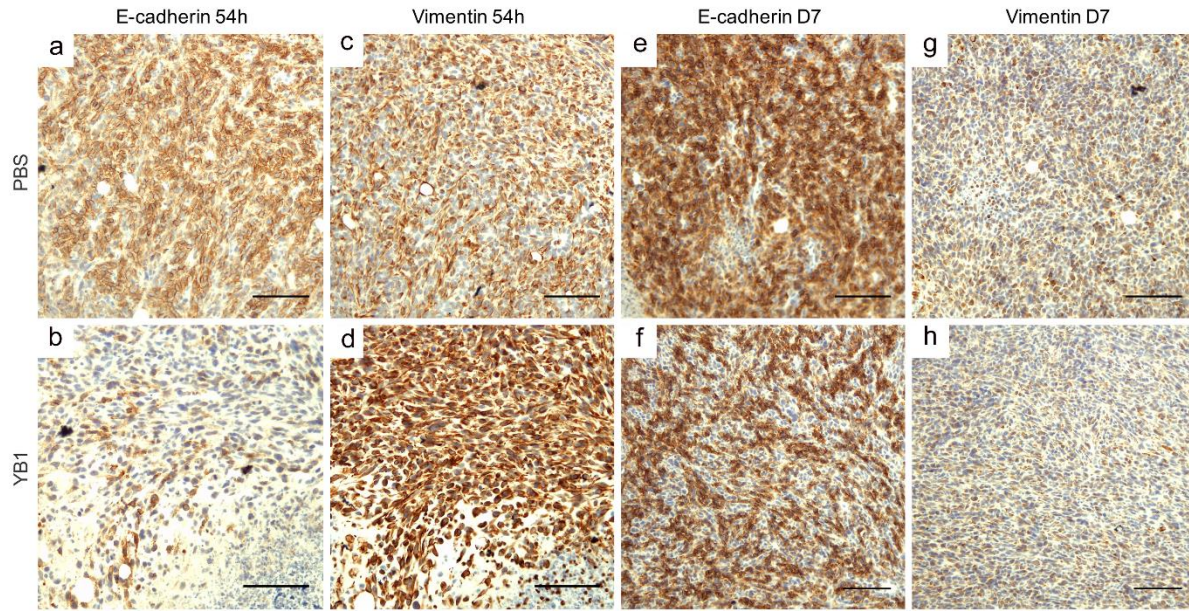

**Supplementary Fig. 2 *Salmonella* YB1 treatment promotes EMT for a short time in the primary tumor.** Primary tumors collected at 54 h (**a-d**) and on day 7 (D7) (**e-h**) from a 4T1-BALB/c orthotopic metastasis model stained with E-cadherin and vimentin as indicated. Scale bar, 100  $\mu$ m. Displayed is one representative experiment of 2 independent experiments.

### Supplementary Fig. 3

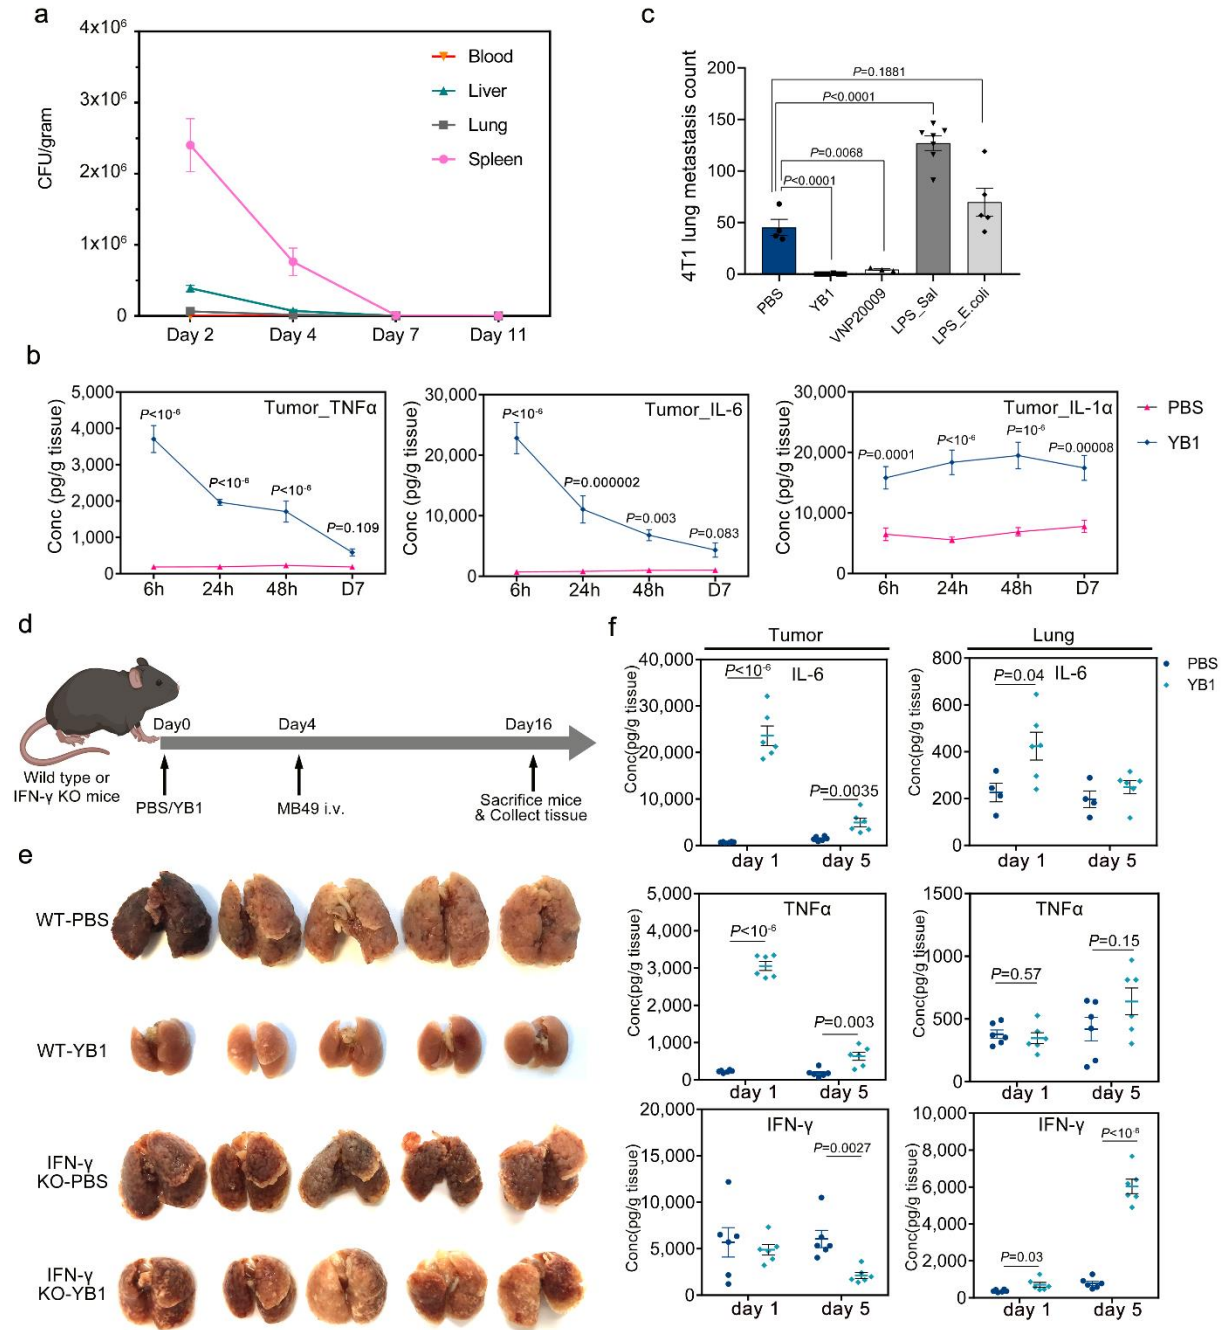

**Supplementary Fig. 3 IFN- $\gamma$ -dependent inflammation induced by *Salmonella* YB1 infection is indispensable to suppress cancer metastasis.** **a** Distribution of *Salmonella* YB1 in blood, liver, lung, and spleen after i.v. injection into BALB/c mice (n=5 per each group). **b** Tumor-localized inflammatory cytokine responses after *Salmonella* YB1 treatment (n=6 per group). P-values were derived using two-sided multiple t-tests. **c** Comparison of 4T1 lung metastases between different *Salmonella* strains and LPS.  $2 \times 10^7$  CFU of YB1 (n=6),  $2 \times 10^7$  CFU of VNP20009 (n=3), 10 ng of LPS from *Salmonella* (LPS\_Sal, n=7), and 10 ng of LPS from *E. coli*

(LPS\_E.coli, n=5) were injected i.v. to BALB/c mice at day 0, respectively. PBS treatment as a control (n=4). 4T1 cells were injected i.v. on day 5 to establish lung metastasis (*p*-values were derived using unpaired two-tailed t-tests). **d** Treatment procedures for the comparison of the anti-metastatic effect of YB1 on wild type C57BL/6J mice and IFN- $\gamma$  knockout mice based on the experimental metastasis model established with MB49 cancer cells. **e** Comparison of the anti-metastatic activity of YB1 on wild type C57BL/6J mice and IFN- $\gamma$  knockout mice (n=5 mice per group); 4% PFA-fixed lung tissues are shown. **f** Left column shows levels of cytokines IL-6, TNF- $\alpha$ , and IFN- $\gamma$  in tumors collected on days 1 and 5 after YB1 treatment. The right column shows levels of cytokines IL-6, TNF- $\alpha$ , and IFN- $\gamma$  in lungs collected on days 1 and 5 after YB1 treatment (n=6 mice per group, *p*-values were derived using multiple two-sided t-tests). All data are presented as mean values  $\pm$  s.e.m. Displayed is one representative experiment of 2 independent experiments. Source data are provided as a Source Data file.

**Supplementary Fig. 4**

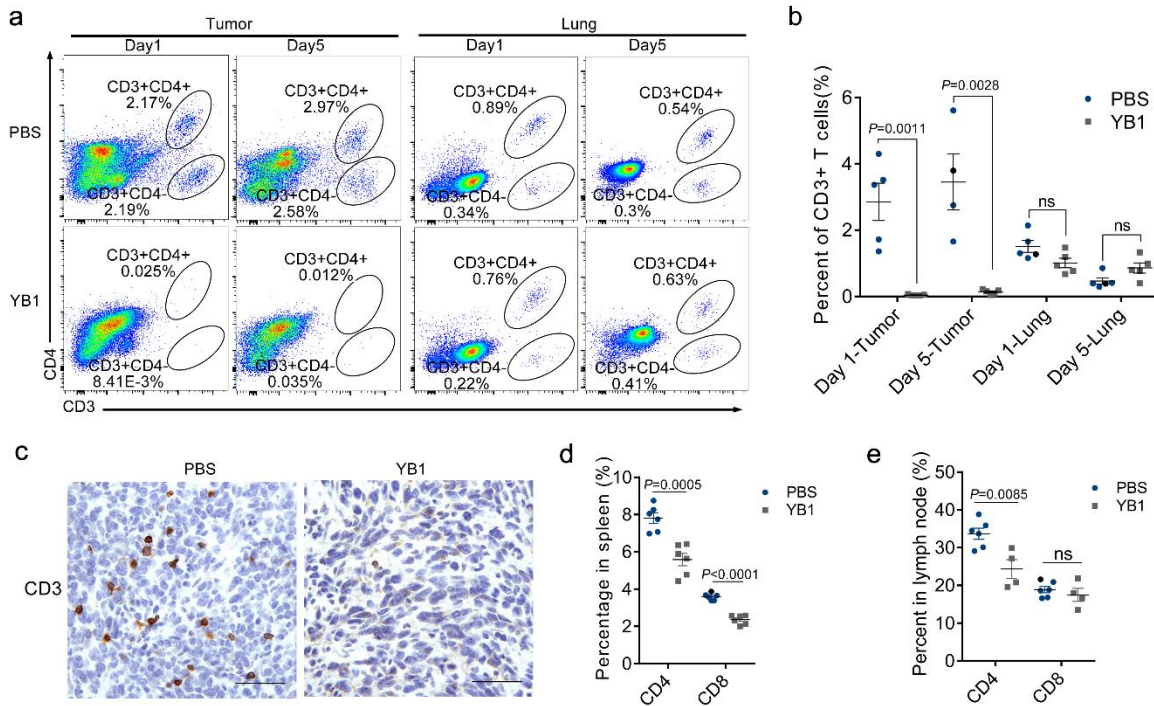

**Supplementary Fig. 4 Reduction of T cells in tumor, spleen and tumor-draining lymph node after YB1 treatment.** The 4T1-BALB/c orthotopic metastasis model was established and was treated with YB1 or PBS. **a** Representative flow cytometry plots of CD3+CD4+ and CD3+CD4- T cells in the tumor and lung of 4T1-BALB/c orthotopic metastasis model treated as indicated (n=5 mice per group). **b** Quantification of CD3+ T cells in tumor and lung tissues collected on day 1 and 5 after YB1 treatment, respectively (n=5 mice per group, *p*-values were derived using two tailed unpaired t tests). **c** Representative images of primary tumor sections stained with the anti-CD3 antibody (displayed is one representative experiment of 2 independent experiments). Tumors were collected on day 2 after YB1 treatment. Scale bar, 50μm. **d** Percentage of CD4+ and CD8+ T cells in spleen collected on day 5 after YB1 treatment was shown (n=6 mice per group, *p*-values were derived using two tailed unpaired t-tests). **e** Percentage of CD4+ and CD8+ T cells in tumor-draining lymph nodes collected on day 5 after YB1 treatment was shown (n=4 for YB1 group, n=6 for PBS group, *p*-values were derived using two tailed unpaired t-tests). All data are presented as mean values +/- s.e.m. Displayed is one representative experiment of 2 independent experiments. Source data are provided as a Source Data file.

Supplementary Fig. 5

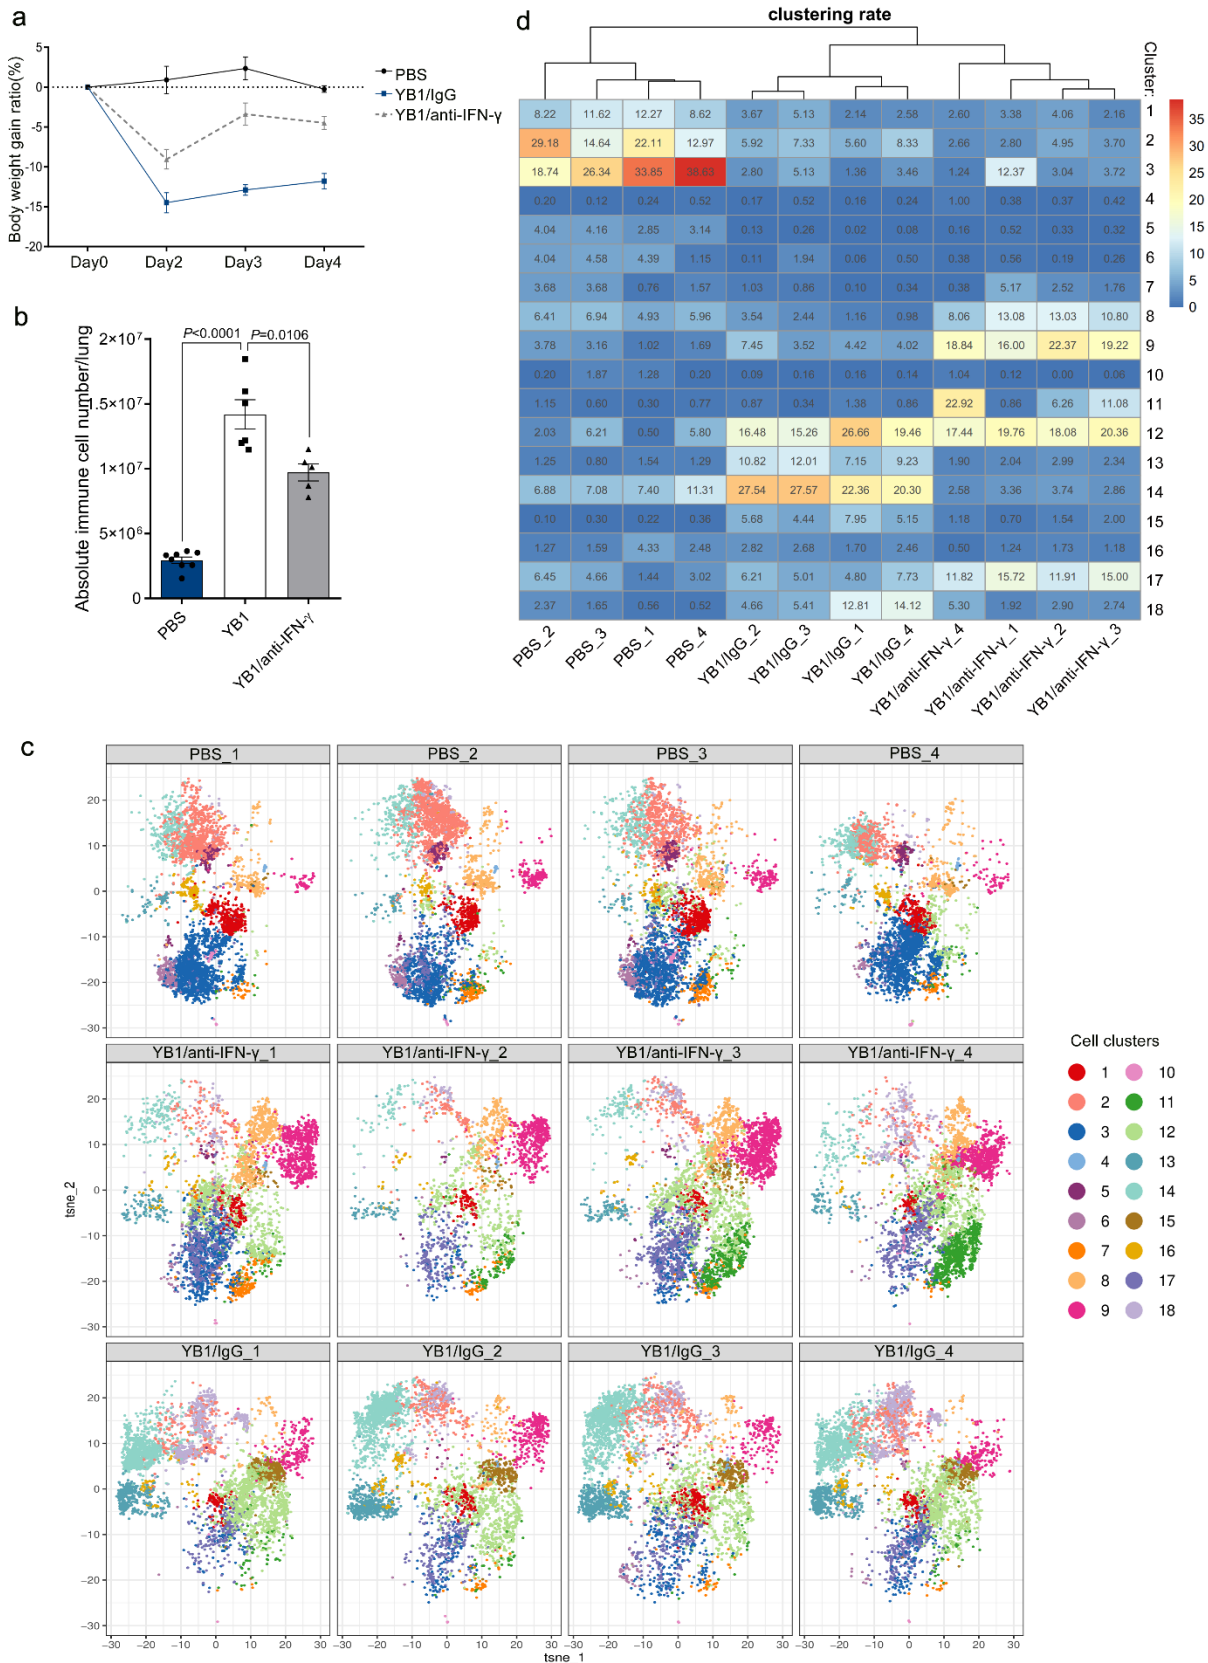

**Supplementary Fig. 5 CyTOF analysis of lung infiltrating immune cells from NOD SCID mice to identify IFN- $\gamma$ -dependent changes due to YB1.** a-b NOD SCID mice were divided into three groups treated with PBS (n=8), YB1 plus IgG isotype (n=6), or YB1 plus IFN- $\gamma$  depletion antibody (n=5). Body weight changes (a) and isolated lung infiltrating immune cells (b) of these mice were quantified before processing for CyTOF staining. *p*-values were derived using two-tailed unpaired t-tests. c t-SNE profiles of samples across three different treatments (n=4 for each group). d Clustering analysis of samples based on the results of t-SNE dimension reduction and PhenoGraph clustering analyses. All data are presented as mean values  $\pm$  s.e.m. Displayed is one representative experiment of 2 independent experiments. Source data are provided as a Source Data file.

**Supplementary Fig. 6**

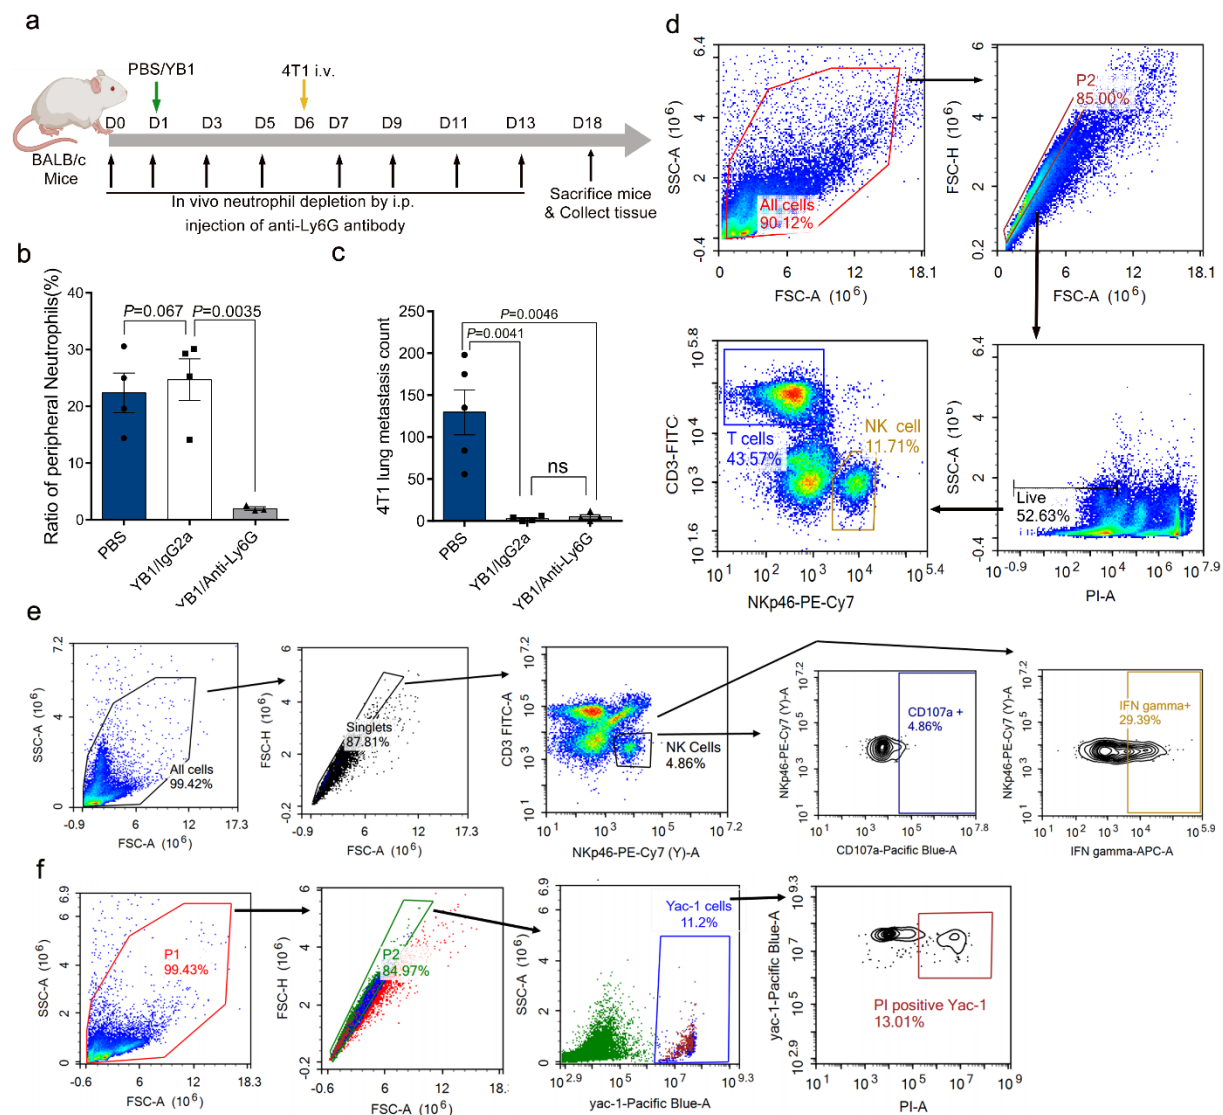

**Supplementary Fig. 6 Neutrophils do not facilitate the suppression of metastasis after YB1 treatment.** a Overall procedures for in vivo neutrophil depletion to confirm the role of

neutrophils in the anti-metastatic effect of YB1 treatment. Mice were treated with PBS, YB1 (YB1/IgG2a), or YB1 plus neutrophil depletion antibody (YB1/anti-Ly6G), respectively. Neutrophil depletion started 1 day before YB1 treatment and was maintained with i.p. injection of anti-Ly6G antibody every other day. **b** Neutrophil depletion efficiency was validated by flow cytometry analysis of peripheral neutrophils 7 days after the initiation of neutrophil depletion (n=3 for YB1/anti-Ly6G; n=4 for others). **c** Quantification of 4T1 lung metastases in the 4T1-BALB/c experimental metastasis model after the three different treatments (n=5 for PBS group, n=4 for others). Neutrophil depletion did not abolish the anti-metastatic effect of YB1 treatment. **d** General gating strategy of flow analysis for live cell analysis. Gates applied in every experiment: SSC-A/FSC-A gate was used to remove debris, FSC-A/FSC-H was used to gate singlets, then PI-positive gate was used to remove dead cells if not for intracellular staining. After this, cells were detected with fluorescent signals of relevant channels. This gating strategy was applied to Fig. 6b, f and Fig. 7b, f, g. **e** Gating strategy of flow analysis for Fig. 6g-h and Fig. 7h-i. **f** Gating strategy of flow analysis for Fig. 6i and Fig. 7j. Boundaries were defined based on negative controls (isotype control staining). All *P*-values were derived using two-tailed unpaired *t*-tests. All data are presented as mean values  $\pm$  s.e.m. Displayed is one representative experiment of 2 independent experiments. Source data are provided as a Source Data file.

## Supplementary Fig. 7

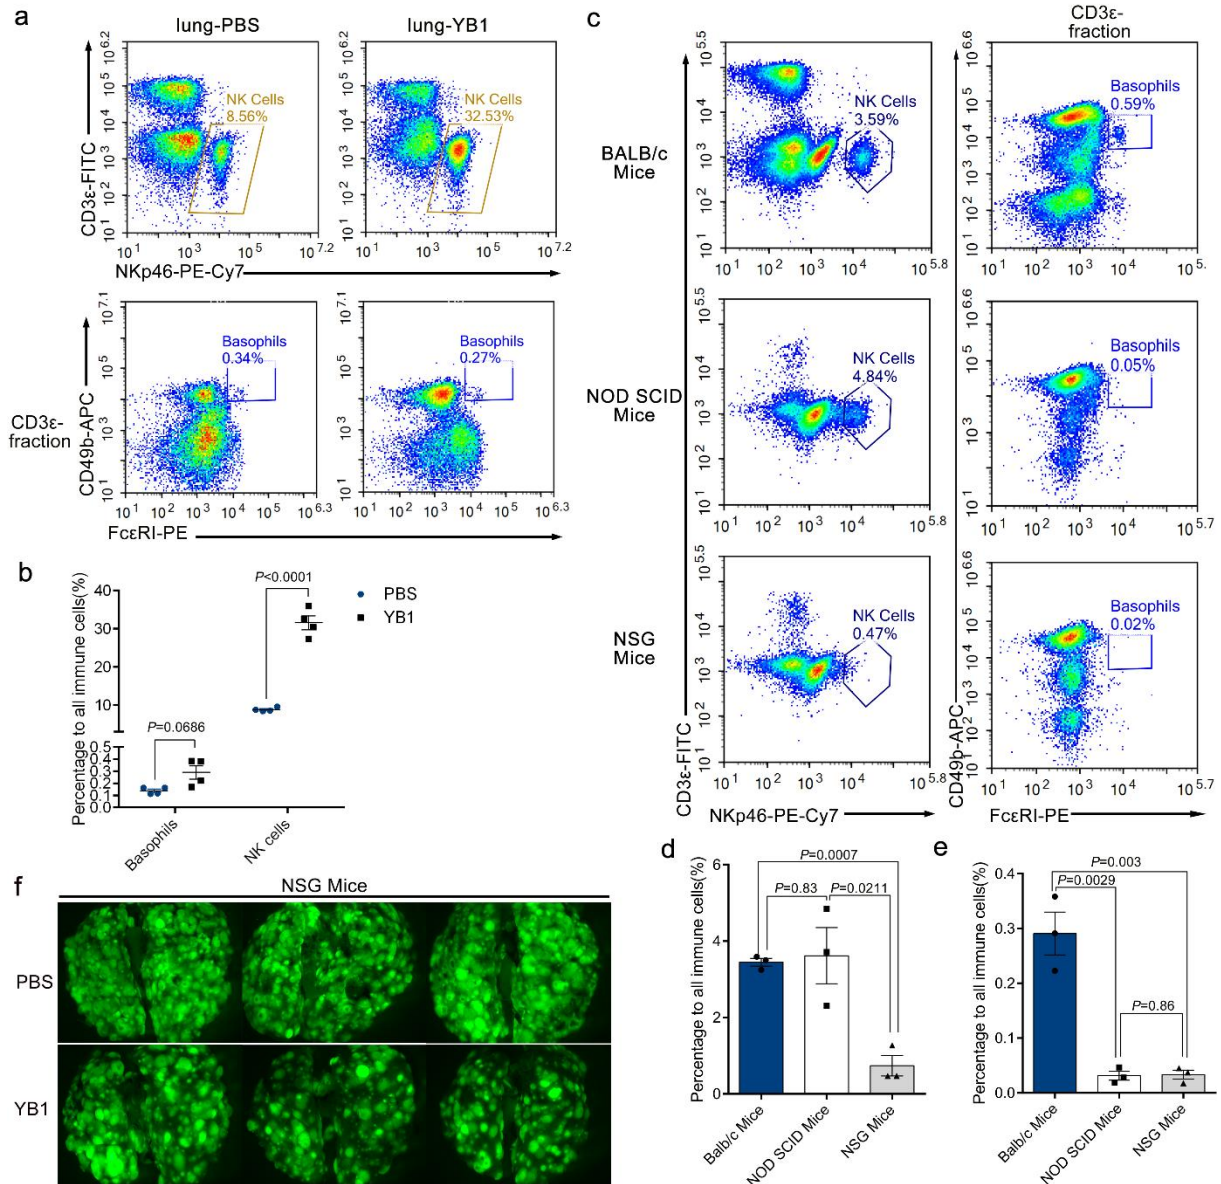

**Supplementary Fig. 7 NK cells, rather than basophils, mediate the anti-metastatic effect of YB1.** **a** Representative flow cytometry plots of CD3-NKp46<sup>+</sup> NK cells and CD3-CD49b<sup>+</sup> FcεRI + basophils in the lung from mice treated as indicated (n=4 mice per group). Lung tissue was collected 6 days after treatment. **b** Quantification of the ratios of CD3-NKp46<sup>+</sup> NK cells and CD3-CD49b<sup>+</sup> FcεRI + basophils mentioned in (a). **c** Representative flow cytometry plots of CD3-NKp46<sup>+</sup> NK cells and CD3-CD49b<sup>+</sup> FcεRI + basophils in BALB/c mice, NOD SCID mice, and NSG mice (n=3 mice per group). Blood samples were collected from three strains of mice for flow cytometry analysis. **d-e** Percentage of NK cells (**d**) and basophils (**e**) in different strains of mice as in (c). Each group have 3 mice. **f** Photos of 4T1-EGFP lung metastasis 12 days

after i.v. injection of  $5 \times 10^4$  4T1-EGFP cells into NSG mice (n=3 per group). Overgrowth of 4T1-EGFP lung metastasis was found in all NSG mice treated either with PBS or YB1. All *p*-values were derived using two-tailed unpaired t-tests. All data are shown as the mean values  $\pm$  s.e.m. Displayed is one representative experiment of 2 independent experiments. Source data are provided as a Source Data file.

## Supplementary Fig. 8

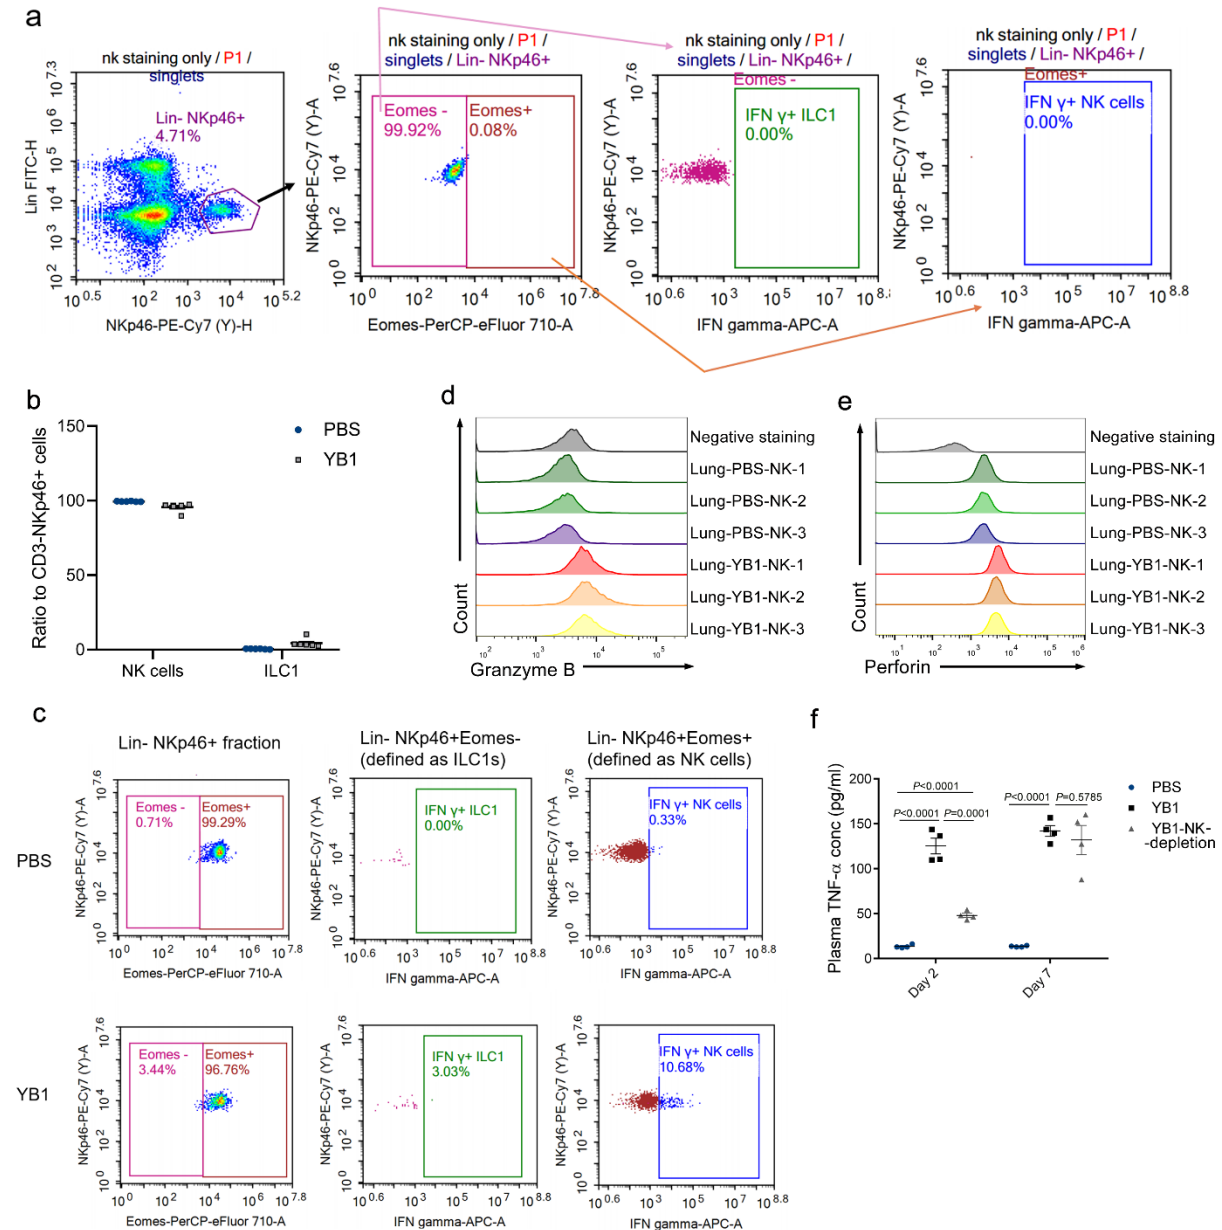

**Supplementary Fig. 8 Lung infiltrating CD3-NKp46+ immune cells mainly are NK cells, rather than ILC1s. a** Gating strategy to distinguish classical NK cells and ILC1s. Gating of Lin-NKp46+ was applied to singlets and further divided into two gates: Eomes- cells (ILC1s) and Eomes + cells (NK cells). IFN- $\gamma$  signal was checked on ILC1s and NK cells. This sample

was only stained by anti-Lin antibody cocktail, anti-NKp46 antibody, isotype control of anti-Eomes antibody, and isotype control of anti-IFN- $\gamma$  antibody. **b** Ratios of NK cells and ILC1 cells to total lung infiltrating Lin-NKp46+ cells. The graph was generated by combining two independent experiments (n=6 mice per group). **c** Representative flow cytometry dot plots illustrating the percentage of ILCs and NK cells from differentially treated mice, as well as their expression of IFN- $\gamma$  after ex vivo co-culture with YAC-1 cells for 4 h. **d-e** BALB/c mice were divided into two groups and treated with PBS or  $2 \times 10^7$  CFU of YB1. All mice were sacrificed 6 days after treatment and lung infiltrating immune cells were isolated for flow cytometric analysis of NK cells. Flow cytometric analysis of granzyme B and perforin on lung infiltrating NK cells across samples after co-culture with YAC-1 cells ex vivo for 5 h was performed (n=3 biological replicates). **f** BALB/c mice were divided into three groups and treated with PBS, YB1, or YB1 plus NK depletion antibody, respectively. NK cell depletion in vivo was started 1 day before YB1 treatment and maintained on days 1, 3, and 6 (n=4 mice per group). Plasma TNF- $\alpha$  concentration was measured on days 2, and 7 after YB1 and PBS treatment. **c-f** Displayed is one representative experiment of 2 independent experiments. All *p*-values were derived using two-tailed unpaired t-tests and data was shown as the mean values  $\pm$  s.e.m. Source data are provided as a Source Data file.

**Supplementary Table 1. Antibodies and reagents for CyTOF**

| <b>Isotope</b> | <b>Antibody</b>    | <b>Clone</b> | <b>Distributor</b> | <b>Cat. number</b> |
|----------------|--------------------|--------------|--------------------|--------------------|
| 141Pr          | Ly-6G              | 1A8          | Fluidigm           | Cat# 3141008B      |
| 142Nd          | CD11c              | N418         | Fluidigm           | Cat# 3142003B      |
| 143Nd          | IL-5               | TRFK5        | Fluidigm           | Cat# 3143003B      |
| 144Nd          | IL-2               | JES6-5H4     | Fluidigm           | Cat# 3144002B      |
| 145Nd          | CD69               | H1.2F3       | Fluidigm           | Cat# 3145005B      |
| 146Nd          | F4/80              | BM8          | Fluidigm           | Cat# 3146008B      |
| 147Sm          | CD45               | 30-F11       | Fluidigm           | Cat# 3147003B      |
| 148Nd          | CD11b (Mac-1)      | M1/70        | Fluidigm           | Cat# 3148003B      |
| 149Sm          | CD19               | 6D5          | Fluidigm           | Cat# 3149002B      |
| 150Nd          | CD44               | IM7          | Fluidigm           | Cat# 3150018B      |
| 151Eu          | CD25               | PC-61.5.3    | Bioxcell           | Cat# BE0012        |
| 152Sm          | CD3e               | 145-2C11     | Fluidigm           | Cat# 3152004B      |
| 153Eu          | NKP46              | 29A1.4       | Fluidigm           | Cat# 3153006B      |
| 154Sm          | TER-119            | TER119       | Fluidigm           | Cat# 3154005B      |
| 155Gd          | IL-10-purified     | JES5-16E3    | Biolegend          | Cat# 505002        |
| 156Gd          | IL-12-purified     | C18.2        | Biolegend          | Cat# 511802        |
| 159Tb          | CD279 (PD-1)       | 29F.1A12     | Fluidigm           | Cat# 3159024B      |
| 160Gd          | CD62L (L-selectin) | MEL-14       | Fluidigm           | Cat# 3160008B      |
| 162Dy          | TNF $\alpha$       | MP6-XT22     | Fluidigm           | Cat# 3162002B      |
| 163Dy          | CD54 (ICAM-1)      | YN1/1.7.4    | Fluidigm           | Cat# 3163020B      |
| 165Ho          | IFN $\gamma$       | XMG1.2       | Fluidigm           | Cat# 3165003B      |
| 166Er          | IL-4               | 11B11        | Fluidigm           | Cat# 3166003B      |
| 167Er          | IL-6               | MP5-20F3     | Fluidigm           | Cat# 3167003B      |
| 168Er          | CD278/ICOS         | C398.4A      | Fluidigm           | Cat# 3168024B      |

|       |               |              |          |               |
|-------|---------------|--------------|----------|---------------|
| 169Tm | TCRb          | H57-597      | Fluidigm | Cat# 3169002B |
| 170Er | CD49b         | HMa2         | Fluidigm | Cat# 3170008B |
| 171Yb | CD80          | 16-10A1      | Fluidigm | Cat# 3171008B |
| 172Yb | CD86          | GL1          | Fluidigm | Cat# 3172016B |
| 173Yb | Ly6C-purified | HK1.4        | Bioxcell | Cat# BE0284   |
| 174Yb | IL-17A        | TC11-18H10.1 | Fluidigm | Cat# 3174002B |
| 175Lu | CD38          | 90           | Fluidigm | Cat# 3175014B |
| 176Yb | CD45R (B220)  | RA3-6B2      | Fluidigm | Cat# 3176002B |
| 209Bi | I-A/I-E       | M5/114.15.2  | Fluidigm | Cat# 3209006B |

| Reagent                                                           |                    |              |
|-------------------------------------------------------------------|--------------------|--------------|
| Intercalator-103Rh                                                | Fluidigm           | Cat# 201103A |
| Intercalator-Ir                                                   | Fluidigm           | Cat# 201192A |
| FcR Blocking Reagent, TruStain FcX™ (anti-mouse CD16/32) Antibody | Biolegend          | Cat# 101320  |
| Antibody Stabilizer based on PBS                                  | Candor Biosciences | Cat# 131050  |
| Bond-Breaker™ TCEP Solution, Neutral pH                           | Pierce             | Cat# 77720   |
| Calibration Beads, EQ(TM) Four Element                            | Fluidigm           | Cat# 201078  |
| Fix I Buffer (5X)                                                 | Fluidigm           | Cat# 201065  |
| Perm-S Buffer                                                     | Fluidigm           | Cat# 201066  |
| Cell Staining Buffer                                              | Fluidigm           | Cat# 201068  |
| Maxpar® Water                                                     | Fluidigm           | Cat# 201069  |
| Maxpar X8 Multimetal labeling kit                                 | Fluidigm           | Cat# 201300  |
| Lanthanide (III) metal isotopes as chloride salts                 | Fluidigm           | N/A          |

|                                                                    |           |                |
|--------------------------------------------------------------------|-----------|----------------|
| Amicon Ultra-0.5 Centrifugal Filter Unit with Ultracel-3 membrane  | Millipore | Cat# UFC500396 |
| Amicon Ultra-0.5 Centrifugal Filter Unit with Ultracel-50 membrane | Millipore | Cat# UFC505096 |

**Supplementary Table 2. Antibodies used for flow cytometry analysis and immunohistochemistry**

| Antigen          | Fluorescent conjugate | Vendor                   | Cat. number | Clone name                                  | Dilution |
|------------------|-----------------------|--------------------------|-------------|---------------------------------------------|----------|
| CD3              | PE                    | BioLegend                | 100206      | 17A1                                        | 1:150    |
| CD4              | Alexa Fluor 488       | BioLegend                | 100423      | GK1.5                                       | 1:1000   |
| CD8a             | PE                    | BioLegend                | 100708      | 53-6.7                                      | 1:100    |
| CD3              | FITC                  | eBioscience              | 11-0032-82  | 17A2                                        | 1:200    |
| Gr-1             | Brilliant Violet 421  | BioLegend                | 108433      | RB6-8C5                                     | 1:50     |
| Ly-6G            | PE-Cy7                | BioLegend                | 127618      | 1A8                                         | 1:200    |
| CD49b            | APC                   | BioLegend                | 108910      | DX5                                         | 1:100    |
| NKp46            | PE-Cy7                | eBioscience              | 25-3351-82  | 29A1.4                                      | 1:50     |
| NKp46            | PE                    | eBioscience              | 12-3351-80  | 29A1.4                                      | 1:50     |
| CD45             | PE                    | BioLegend                | 103106      | 30-F11                                      | 1:100    |
| IFN- $\gamma$    | APC                   | eBioscience              | 17-7311-81  | XMG1.2                                      | 1:100    |
| CD11b            | eFluor 450            | eBioscience              | 48-0112-80  | M1/70                                       | 1:100    |
| CD27             | Super Bright 600      | eBioscience              | 63-0271-80  | LG.7F9                                      | 1:50     |
| CD11c            | Alexa Fluor 700       | eBioscience              | 56-0114-80  | N418                                        | 1:50     |
| NKG2D            | APC                   | Thermo Fisher Scientific | 17-5882-81  | CX5                                         | 1:100    |
| CD38             | BV711                 | BD Biosciences           | 740697      | 90/CD38                                     | 1:100    |
| CD107a           | V450                  | BD Biosciences           | 560648      | 1D4B                                        | 1:100    |
| Perforin         | APC                   | Thermo Fisher Scientific | 17-9392-80  | eBioOMAK-D                                  | 1:100    |
| Granzyme B       | eFluor 450            | Thermo Fisher Scientific | 48-8898-80  | NGZB                                        | 1:100    |
| Lineage Cocktail | FITC                  | BioLegend                | 133301      | 145-2C11; RB6-8C5; RA3-6B2; Ter-119; M1/70; | 1:10     |
| FceR1 alpha      | PE                    | Invitrogen               | 12-5898-81  | MAR-1                                       | 1:100    |
| Eomes            | PerCP-eFluor 710      | Invitrogen               | 46-4875-80  | Dan11mag                                    | 1:100    |
| CD3              | No conjugate          | abcam                    | Ab16669     | SP7                                         | 1:150    |
| E-cadherin       | No conjugate          | Cell Signaling           | #3195       | 24E10                                       | 1:400    |
| Vimentin         | No conjugate          | Cell Signaling           | #5741       | D21H3                                       | 1:200    |
